# Supplementary material for: Analysis of Malnutrition among Children under Five Years across Contrasting Agroecosystems of Northwest Ethiopia: Application of Structural Equation Modeling
Source: MDPI journal article supplement (doi:10.3390/nu16081208), 2024-04-18
Supplement: s1 [file s1]

## Supplementary Materials

Table S1: Socio-demographic and economic characteristics of the respondents.

| Characteristics              |                    | Agroecosystem Zones (%) |                 |                 |                 |                 |
|------------------------------|--------------------|-------------------------|-----------------|-----------------|-----------------|-----------------|
|                              |                    | AEZ-1                   | AEZ-2           | AEZ-3           | AEZ-4           | Total           |
| Child sex                    | Girls              | 45.0                    | 46.3            | 52.0            | 41.1            | 46.3            |
|                              | Boys               | 55.0                    | 53.7            | 48.0            | 58.9            | 53.8            |
| Child age                    | 0 – 6 months       | 18.0                    | 10.2            | 16.7            | 3.3             | 12.3            |
|                              | 6 - 23 months      | 40.0                    | 48.1            | 33.3            | 46.7            | 42.0            |
|                              | 24 - 59 months     | 42.0                    | 41.7            | 50.0            | 50.0            | 45.8            |
| Maternal education           | No education       | 82.0                    | 90.7            | 79.4            | 73.3            | 81.8            |
|                              | Informal education | 13.0                    | 0.0             | 1.0             | 20.0            | 8.0             |
|                              | Primary education  | 4.0                     | 9.3             | 14.7            | 1.1             | 7.5             |
|                              | Secondary & above  | 1.0                     | 0.0             | 4.9             | 5.6             | 2.8             |
| Marital status               | Single             | 0.0                     | 7.4             | 3.9             | 1.1             | 3.3             |
|                              | Married            | 97.0                    | 91.7            | 91.2            | 98.9            | 94.5            |
|                              | Widowed            | 3.0                     | 0.9             | 4.9             | 0.0             | 2.3             |
| Household wealth             | Poor               | 53.0                    | 11.1            | 44.6            | 63.3            | 33.3            |
|                              | Meddle             | 28.0                    | 25.9            | 51.5            | 32.2            | 34.3            |
|                              | Rich               | 19.0                    | 63              | 4.0             | 4.0             | 32.3            |
| Maternal Training            | No                 | 83.0                    | 81.5            | 60.8            | 77.8            | 75.8            |
|                              | Yes                | 17.0                    | 18.5            | 39.2            | 22.2            | 24.3            |
| Media exposure               | No                 | 97.0                    | 88.9            | 92.2            | 82.2            | 90.3            |
|                              | Yes                | 3.0                     | 11.1            | 7.8             | 9.8             | 17.8            |
| Decision making              | No equal power     | 35.0                    | 69.4            | 65              | 73.3            | 60.5            |
|                              | Equal power        | 65.0                    | 30.6            | 35              | 26.7            | 39.5            |
| Maternal age (mean $\pm$ Sd) |                    | 31.53<br>(5.74)         | 34.37<br>(4.84) | 32.17<br>(5.68) | 34.52<br>(4.55) | 33.13<br>(5.38) |
| Family size (mean $\pm$ Sd)  |                    | 4.540                   | 5.194           | 4.912           | 5.300           | 4.98            |

|                                  |                  |                 |                  |                 |                 |
|----------------------------------|------------------|-----------------|------------------|-----------------|-----------------|
|                                  | (1.40)           | (1.38)          | (1.78)           | (1.89)          | (1.64)          |
| Landholding size (mean $\pm$ Sd) | 1.47<br>(1.04)   | 1.47<br>(.92)   | 0.45<br>(.54)    | 1.0<br>(1.17)   | 1.11<br>(1.03)  |
| Livestock size (mean $\pm$ Sd)   | 3.18<br>(1.84)   | 7.25<br>(3.21)  | 2.70<br>(2.0)    | 2.36<br>(2.16)  | 3.97<br>(3.12)  |
| Market distance (mean $\pm$ Sd)  | 93.08<br>(21.80) | 85.0<br>(17.61) | 34.80<br>(13.52) | 42.0<br>(29.60) | 64.54<br>(33.2) |

Table S2: Binary logistic regression analysis output of direct effect of immediate factors on malnutrition.

|                             | B      | S.E.  | Exp(B) | Sig.   |
|-----------------------------|--------|-------|--------|--------|
| Agroecosystem               |        |       |        | 0.004  |
| Agroecosystem(1)            | -0.858 | 0.389 | 0.424  | 0.027  |
| Agroecosystem(2)            | -0.495 | 0.393 | 0.609  | 0.207  |
| Agroecosystem(3)            | -1.295 | 0.377 | 0.274  | <0.001 |
| Exclusive breastfeeding(1)  | 0.158  | 0.292 | 1.171  | 0.588  |
| Child dietary diversity (1) | -1.661 | 0.260 | 0.190  | <0.001 |
| Diarrheal disease(1)        | 0.583  | 0.366 | 1.791  | 0.111  |
| Child fever(1)              | -0.291 | 0.367 | 0.748  | 0.428  |
| ARI(1)                      | 0.302  | 0.598 | 1.352  | 0.614  |
| Constant                    | 0.877  | 0.682 | 2.403  | 0.198  |

Table S3: Standardized indirect effect of structural model.

| Exogenous Variables   | Endogenous Variables (Estimates with P-Value) |                  |    |                 |    |                 |                  |                   |
|-----------------------|-----------------------------------------------|------------------|----|-----------------|----|-----------------|------------------|-------------------|
|                       | FA                                            | MD               | FC | HS              | HE | CD              | Disease          | Malnutrition      |
| NSA practices         | -                                             | 0.012<br>(0.087) | -  | 0.18<br>(0.003) | -  | 0.08<br>(0.012) | -0.05<br>(0.007) | -0.03<br>(0.038)  |
| Empowerment           | -                                             | 0.049<br>(0.026) | -  |                 | -  | 0.17<br>(0.013) | -0.33<br>(0.066) | -0.06<br>(0.012)  |
| Household wealth      | -                                             | 0.06<br>(0.012)  | -  |                 | -  | 0.24<br>(0.001) | -0.32<br>(0.002) | -0.12<br>(0.001)  |
| Agroecosystem         | -                                             | -                | -  | -               | -  | -               | -                | -                 |
| Food access           | -                                             | -                | -  | -               | -  | 0.04<br>(0.016) | -0.05<br>(0.111) | -0.16<br>(0.001)  |
| Maternal diet         | -                                             | -                | -  | -               | -  | -               | -0.03<br>(0.108) | -0.09<br>(0.001)  |
| Feeding & care        | -                                             | -                | -  | -               | -  | -               | -2.20<br>(0.001) | -0.059<br>(0.045) |
| Health services       | -                                             | -                | -  | -               | -  | -               | -                | -0.33<br>(0.009)  |
| Household environment | -                                             | -                | -  | -               | -  | -               | -                | -0.03<br>(0.024)  |
| Child dietary intake  | -                                             | -                | -  | -               | -  | -               | -                | -0.02<br>(0.031)  |
| Disease experience    | -                                             | -                | -  | -               | -  | -               | -                | -                 |

Abbreviations on endogenous variables: FA-food access, MD-maternal diet, FC-feeding and care practice, HS-health service, HE-household environment, CD-child dietary intake, Disease-disease experience.

Table S4: Standardized total effect of structural model.

| Exogenous variables   | Endogenous variables (Estimates with P-value) |                 |                 |                 |                 |                 |                  |                                |
|-----------------------|-----------------------------------------------|-----------------|-----------------|-----------------|-----------------|-----------------|------------------|--------------------------------|
|                       | FA                                            | MD              | FC              | HS              | HE              | CD              | Disease          | Malnutrition                   |
| NSA practices         | 0.08<br>(0.120)                               | 0.08<br>(0.181) | 0.17<br>(0.003) | 0.18<br>(0.003) | -               | 0.08<br>(0.012) | -0.05<br>(0.007) | <b>-0.03</b><br><b>(0.038)</b> |
| Maternal Empowerment  | 0.34<br>(0.014)                               | 0.05<br>(0.026) | -               | -               | 0.12<br>(0.219) | 0.17<br>(0.013) | -0.04<br>(0.066) | <b>-0.06</b><br><b>(0.012)</b> |
| Household wealth      | 0.42<br>(0.001)                               | 0.15<br>(0.013) | -               | 0.14<br>(0.008) | -               | 0.24<br>(0.001) | -0.33<br>(0.001) | <b>-0.12</b><br><b>(0.001)</b> |
| Agroecosystem         | -                                             | -               | -               | -               | -               | -               | -                | <b>-0.11</b><br><b>(0.015)</b> |
| Food access           | -                                             | 0.15<br>(0.022) | -               | -               | -               | 0.51<br>(0.001) | -0.05<br>(0.111) | <b>-0.16</b><br><b>(0.001)</b> |
| Maternal diet         | -                                             | -               | -               | -               | -               | 0.28<br>(0.001) | -0.03<br>(0.108) | <b>-0.09</b><br><b>(0.001)</b> |
| Feeding & care        | -                                             | -               | -               | 0.99<br>(0.001) | -               | 0.08<br>(0.233) | -0.23<br>(0.030) | <b>-0.06</b><br><b>(0.491)</b> |
| Health services       | -                                             | -               | -               | -               | -               | -               | -0.99<br>(0.001) | <b>-0.33</b><br><b>(0.009)</b> |
| Household environment | -                                             | -               | -               | -               | -               | -               | -0.18<br>(0.043) | <b>-0.03</b><br><b>(0.024)</b> |
| Child dietary intake  | -                                             | -               | -               | -               | -               | -               | -0.10<br>(0.113) | <b>-0.31</b><br><b>(0.001)</b> |
| Disease experience    | -                                             | -               | -               | -               | -               | -               | -                | <b>0.145</b><br><b>(0.009)</b> |

Abbreviations of endogenous variables: FA-food access, MD-maternal diet, FC-feeding and care practice, HS-health service, HE-household environment, CD-child dietary intake, Disease-disease experience.

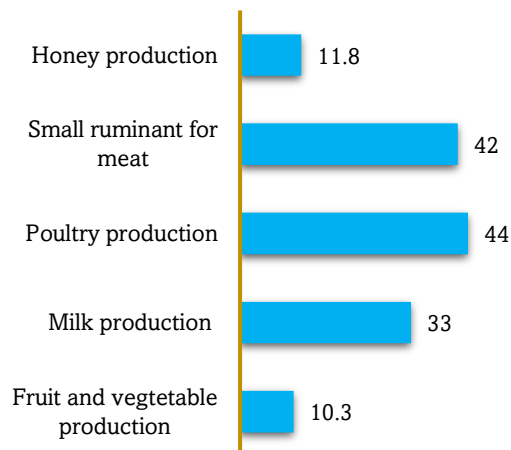

(A) Home-gardening practices

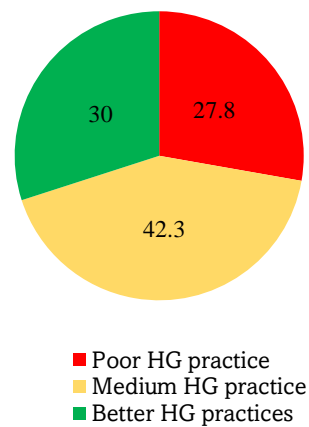

(B) Home-gardening practices status

Figure S1: Home-gardening practices as nutrition sensitive agricultural practices in the households (%).
